# Supplementary material
Source: Springer Nature journal article supplement (https://www.springermedizin.de/resource/supplementary/12885_2007_965_MOESM3_ESM.pdf/9471414)

# TP53(+)

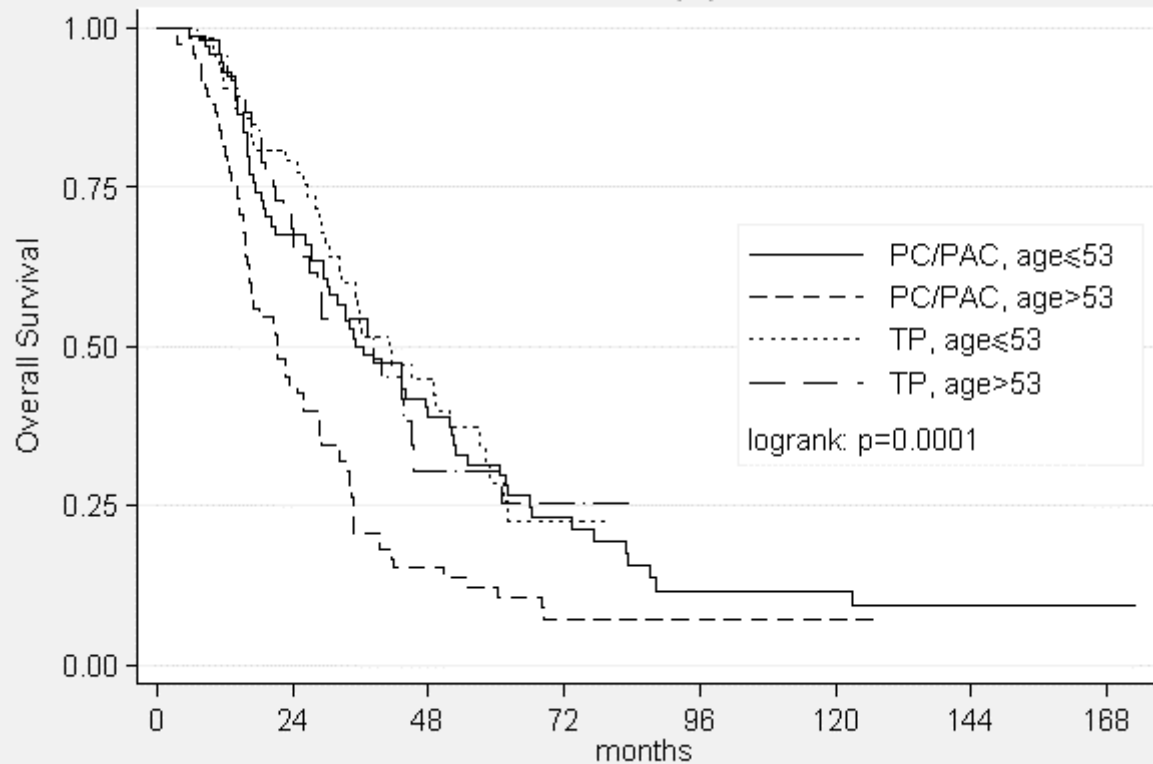

Supplement: MOESM3 [file 9471414]
